# Supplementary material
Source: PubMed Central journal article supplement (PMC3675929)
Supplement: AEM.00560-13_zam999104441so1.pdf [file AEM.00560-13_zam999104441so1.pdf]

**Table S1.** Primers used in the cloning experiments in this study

| Primer     | Sequence, 5' to 3'                               |
|------------|--------------------------------------------------|
| ahpC1-0    | GTTGTTGGACGCACTTGATCTC                           |
| ahpC1-1    | AGCTTCACCTCGATTCAGGAAC                           |
| ahpC1-2    | GAGCTTAAATTCAGTGGCTTAGTATGC<br>TGTAGCTGCAAATGGTT |
| ahpC1-3    | AACCATTTGCAGCTACAGCATACTAAG<br>CCACTGAATTTAAGCTC |
| ahpC1-4    | GAGTGAAATGAACACTTCAACATCC                        |
| ahpC1-5    | CTTGGTACTGCCATGATGTCAC                           |
| ahpC2-0    | CATCTAACTCACCATGACGCAG                           |
| ahpC2-1    | CACCTCTTGGACGAGGTCAC                             |
| ahpC2-2    | CTGCGTGCTCAGATAGGAACTCACCGT<br>TACCTAGAACAGCTG   |
| ahpC2-3    | CAGCTGTTCTAGGTAACGGTGAGTTCC<br>TATCTGAGCACGCAG   |
| ahpC2-4    | TCAGTACGCCAAGCACCCTC                             |
| ahpC2-5    | CGAGACCAGAAGTCAGAATACG                           |
| ahpC1-salI | ACGCGTCGACGTTGTTGGACGCACTTG ATCTC                |
| ahpC1-sphI | ACATGCATGCGCAGAAGGTCGTCAAGG TATC                 |
| ahpC2-salI | ACGCGTCGACCACCTCTTGGACGAGGT CAC                  |
| ahpC2-sphI | ACATGCATGCTCAGTACGCCAAGCACC ACTC                 |
