# Supplementary material
Source: PubMed Central journal article supplement (PMC3675929)
Supplement: AEM.00560-13_zam999104441so2.pdf [file AEM.00560-13_zam999104441so2.pdf]

**TABLE S2.** Primers used in the reverse transcriptase-PCR detection in *V. parahaemolyticus*

| Target   | Gene/Function       | Sequence, 5'→3'                               | Amplicon, bp | Reference  |
|----------|---------------------|-----------------------------------------------|--------------|------------|
| 16S rRNA |                     | CAGGCCTAACACATGCAAGTC<br>ATTACCGCGGCTGCTGG    | 471          | (1)        |
| VP2553   | <i>rpoS</i>         | CCATTCGCTTGCCTATTCAT<br>CTCGTCCCCTTCTTCAAGC   | 410          | This study |
| VP2752   | <i>oxyR</i>         | CGCATTCTGAGTGAGGTGAA<br>AACACGGTCTTCCCCATTGAG | 367          | This study |
| VPA1683  | <i>ahpC1</i>        | ACCAAACAGGCAACATCACA<br>GCCTTCTTTCCATTTGCTG   | 279          | This study |
| VP0580   | <i>ahpC2</i>        | GTGTTGCTTTCGGTGGTCT<br>CAGATAGGAACGCTGCAACA   | 219          | This study |
| VPA0305  | catalase            | CACATCTCTACAGGCGCAA<br>GCTGTACACCCAAGTCAGCA   | 547          | This study |
| VPA0453  | Catalase/peroxidase | GGCATAACCCAATCATGACC<br>TTGGAGCCAGTTTCGATACCC | 643          | This study |
| VPA0768  | Catalase/peroxidase | GGACCCTGAATATCGCAAGA<br>CCGTCCATTTCACTTGGTCT  | 872          | This study |
| VPA1418  | Catalase            | GAACGAGACATCCGTGGTTT<br>TTTCTGGGTTACGGTTCAGC  | 595          | This study |

## REFERENCES

1. Miyake, R., J. Kawamoto, Y. L. Wei, M. Kitagawa, I. Kato, T. Kurihara,

**and N. Esaki.** 2007. Construction of a low-temperature protein expression system using a cold-adapted bacterium, *Shewanella* sp. strain Ac10, as the host. *Appl. Environ. Microbiol.* **73**:4849-4856.
