# Supplementary material
Source: PubMed Central journal article supplement (PMC3675929)
Supplement: AEM.00560-13_zam999104441so4.pdf [file AEM.00560-13_zam999104441so4.pdf]

## Supplementary Figure S2

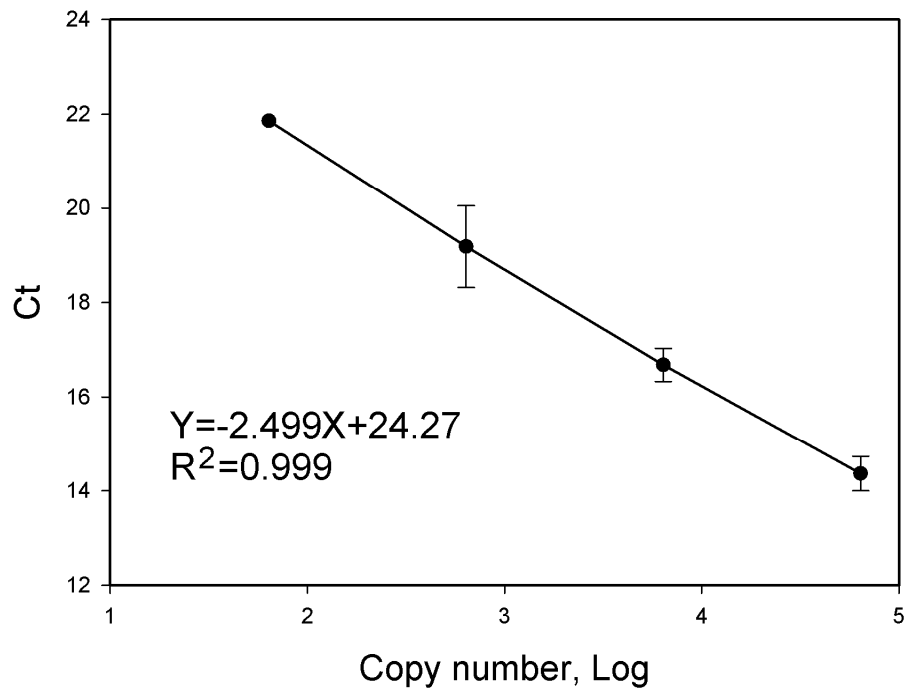

FIG. S2. Correlation between the copy numbers of target (VP2468) gene and the Ct values following the real-time quantitative reverse transcription-polymerase chain reaction (RT-qPCR) protocol used in this study.
